# Supplementary figures and images for: Immune dynamics in SARS-CoV-2 experienced immunosuppressed rheumatoid arthritis or multiple sclerosis patients vaccinated with mRNA-1273
Source: eLife journal article supplement (doi:10.7554/elife.77969), 2022-07-15

Figure 1—figure supplements 1

a

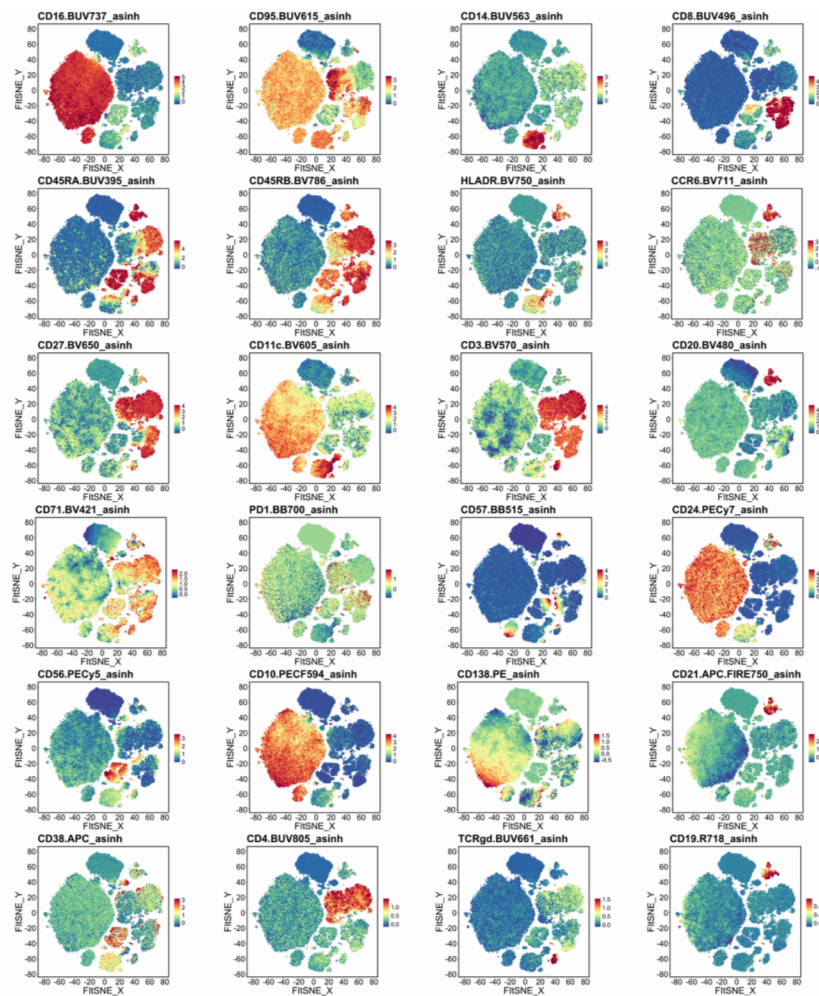

b

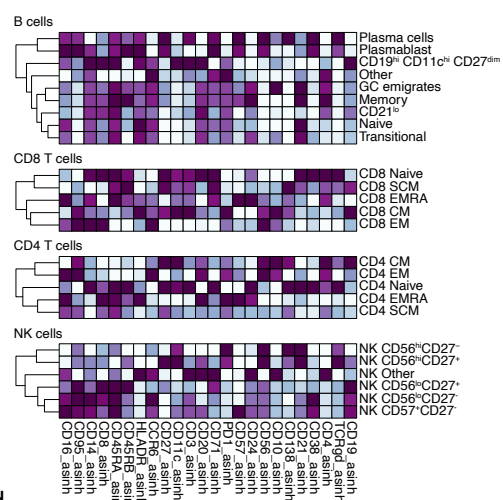

d

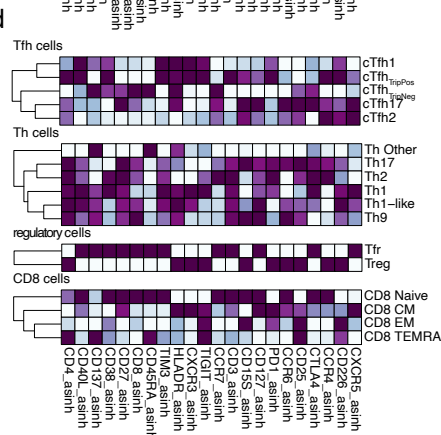

e

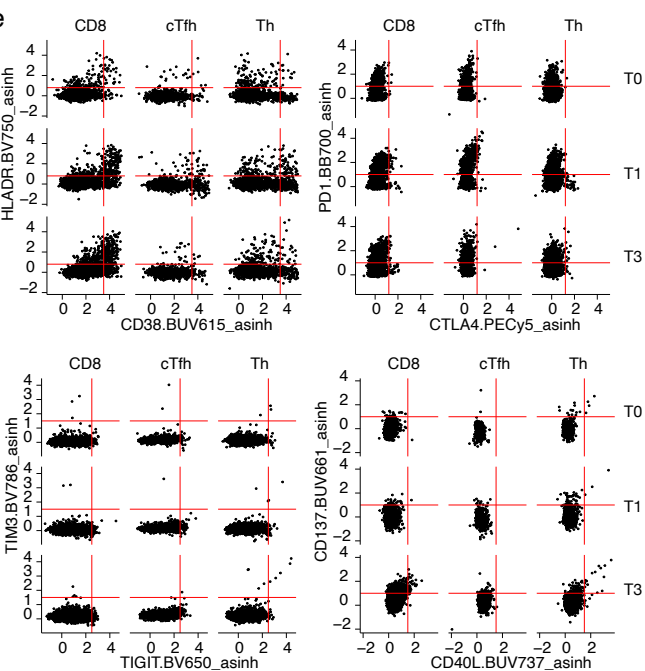

c

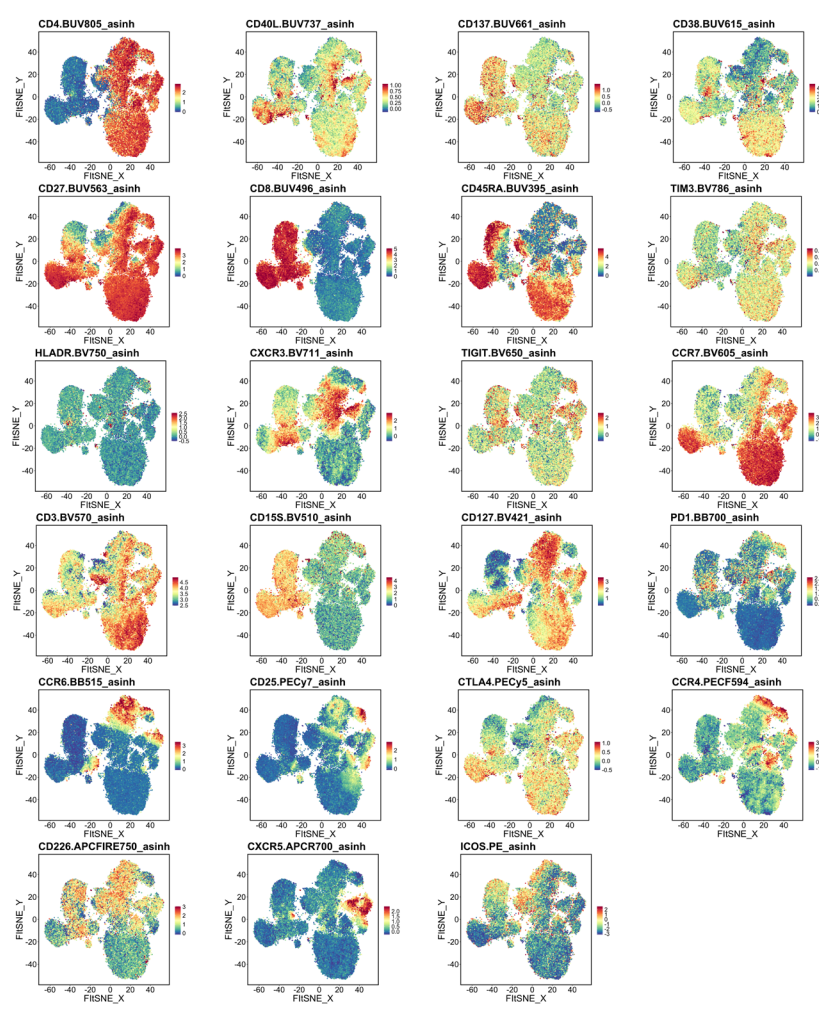

Supplement: supp [file elife_poa_e77969_Figure_1_figure_supplement_1.pdf › elife_poa_e77969_Figure_1_figure_supplement_1.pdf]

Figure 1 —figure supplements 3

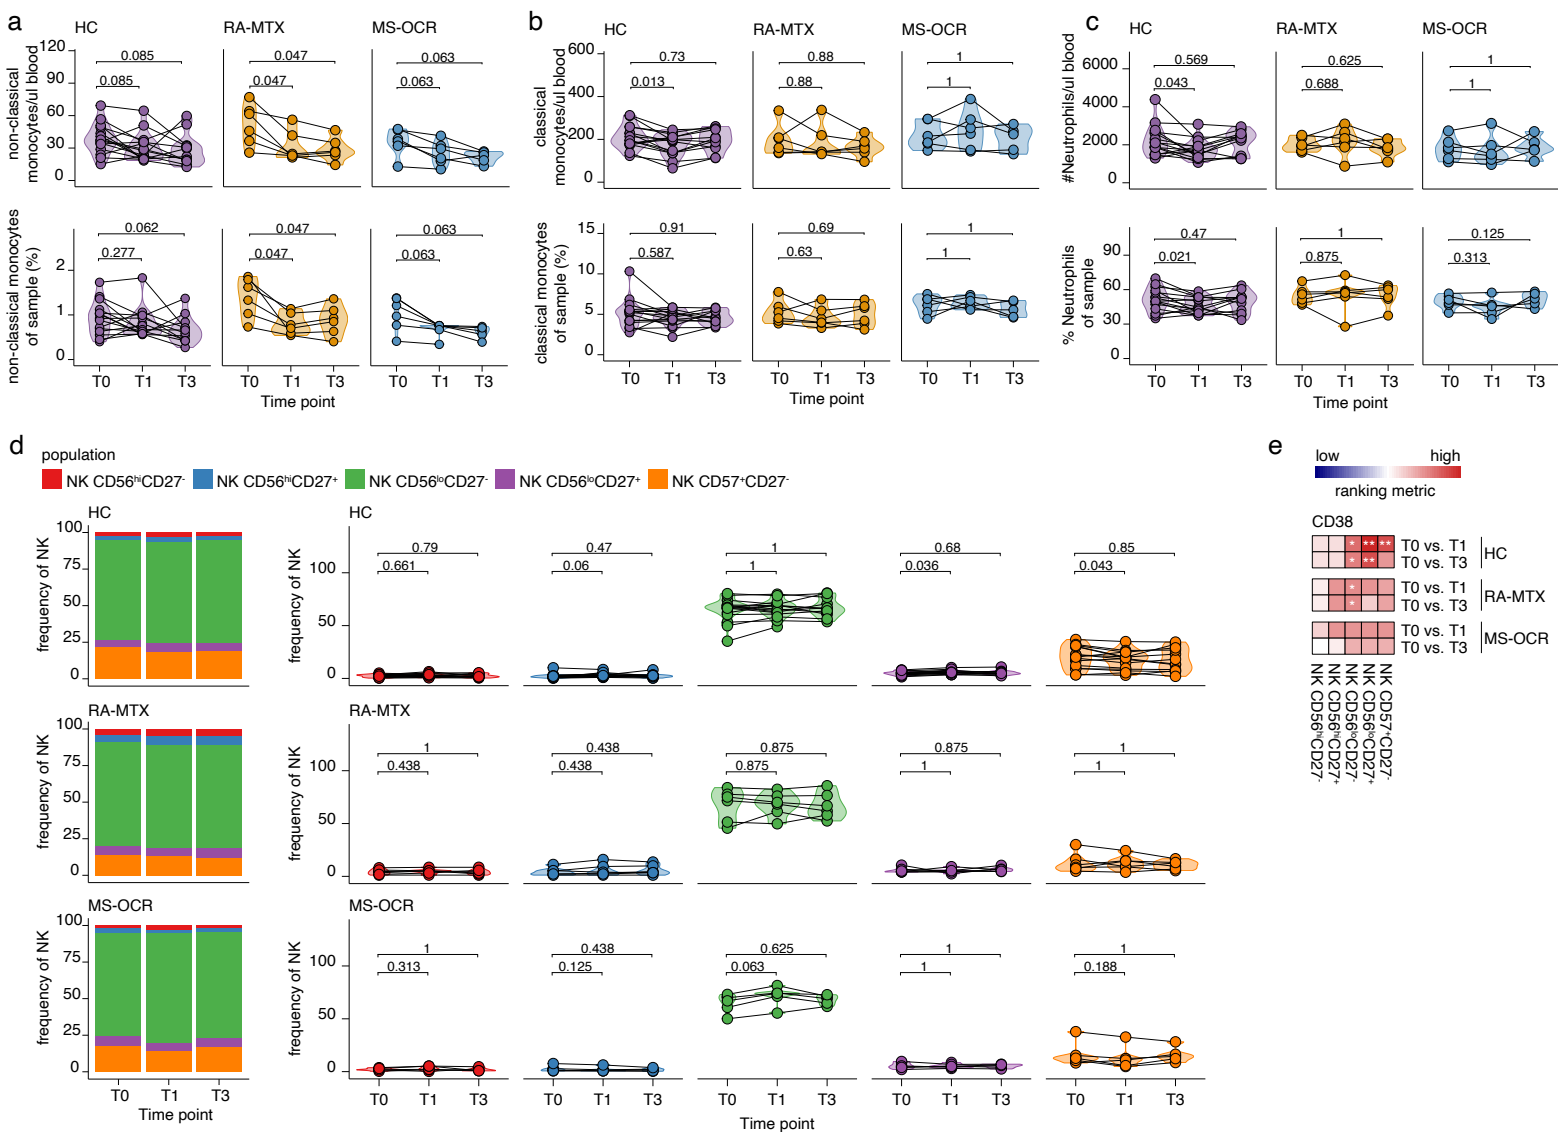

Supplement: supp [file elife_poa_e77969_Figure_1_figure_supplement_3.pdf › elife_poa_e77969_Figure_1_figure_supplement_3.pdf]

**Figure 2—figure supplements 1**

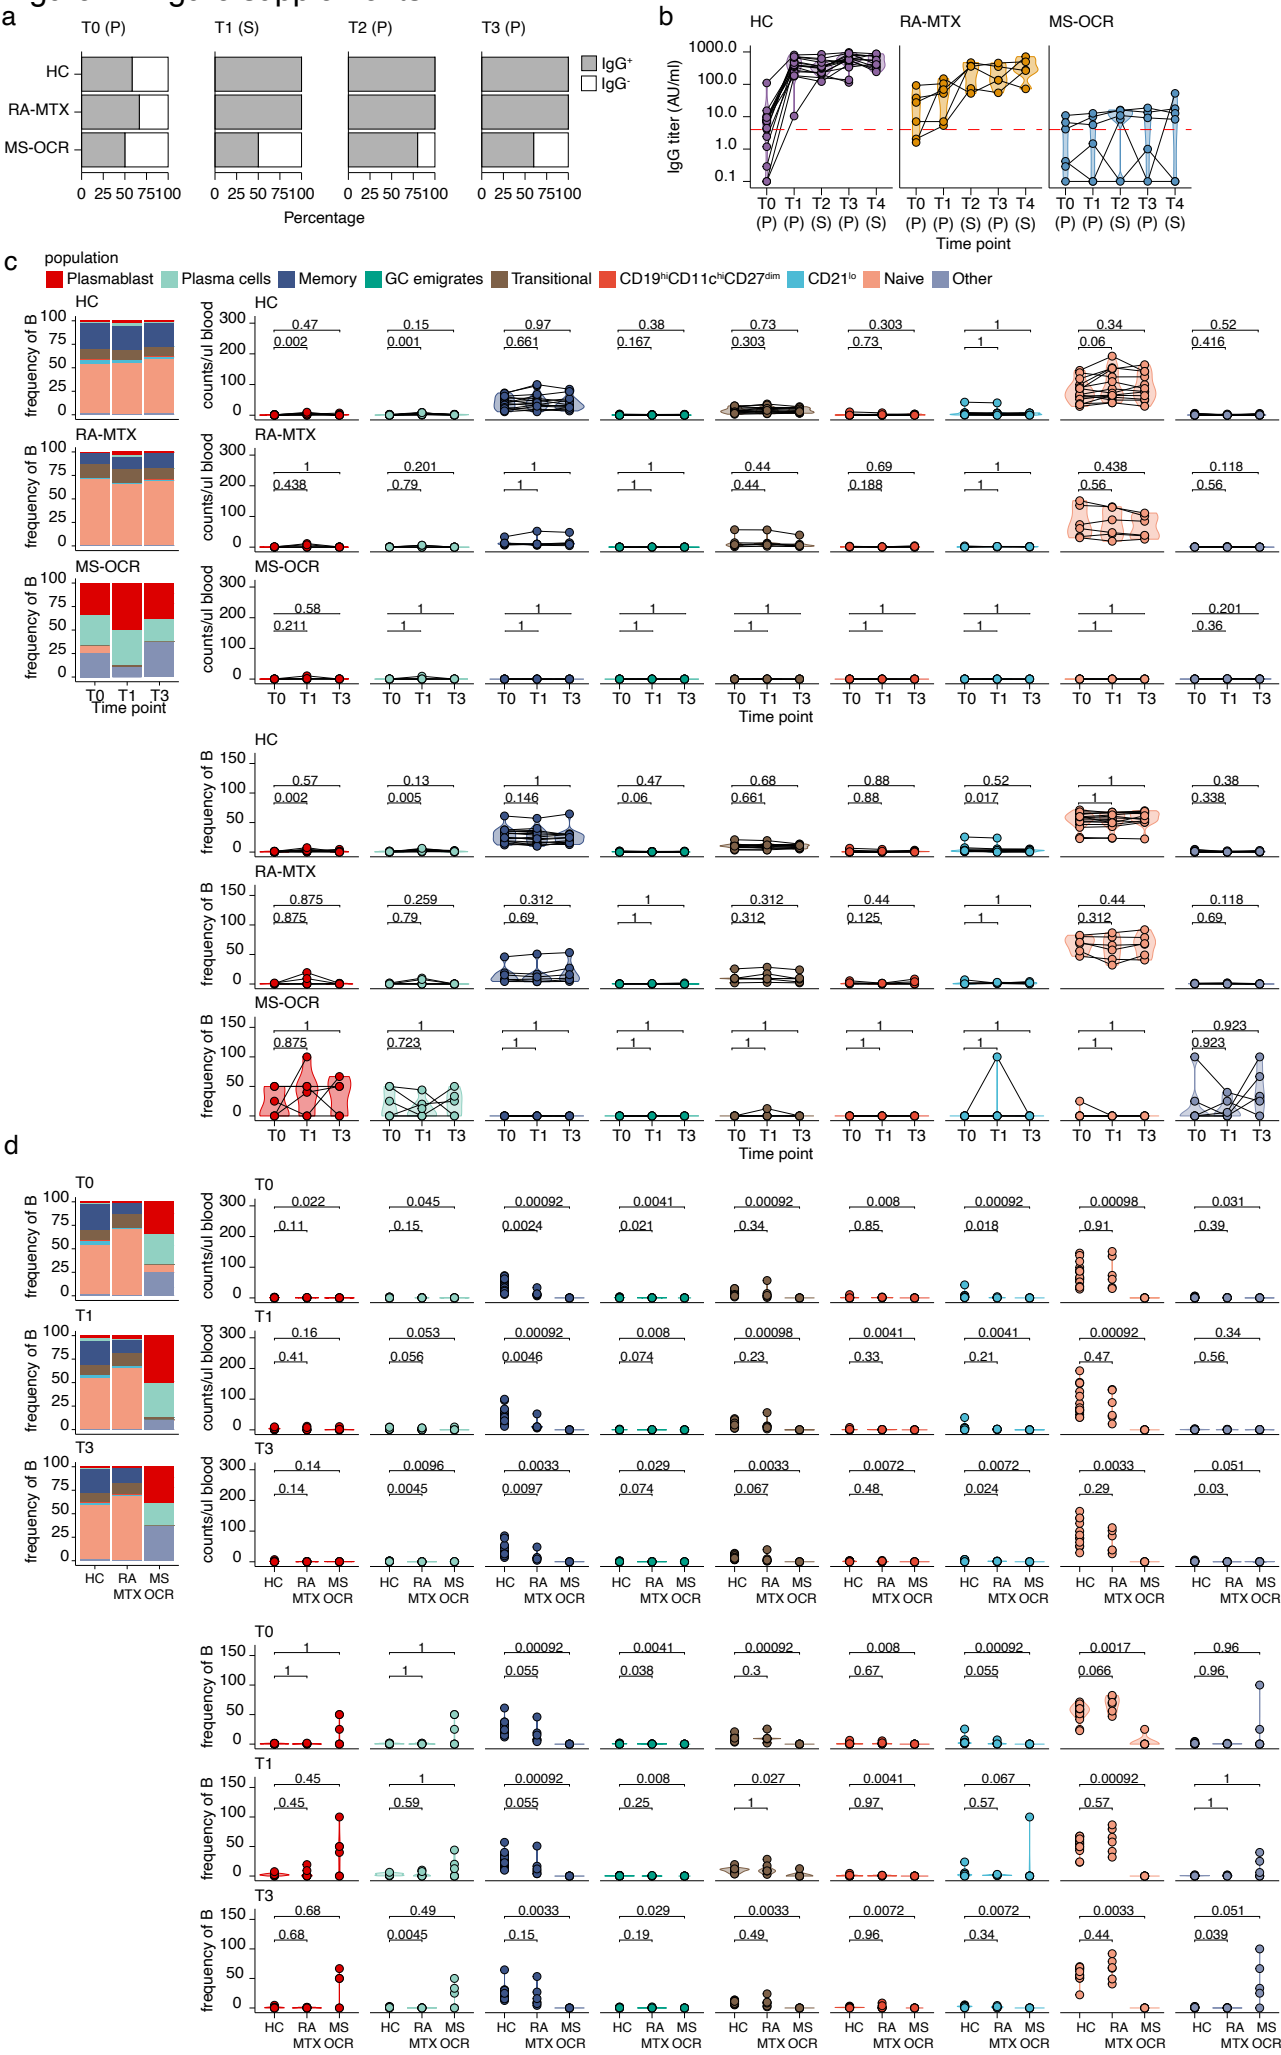

Supplement: supp [file elife_poa_e77969_Figure_2_figure_supplement_1.pdf › elife_poa_e77969_Figure_2_figure_supplement_1.pdf]

Figure 3—figure supplements 1

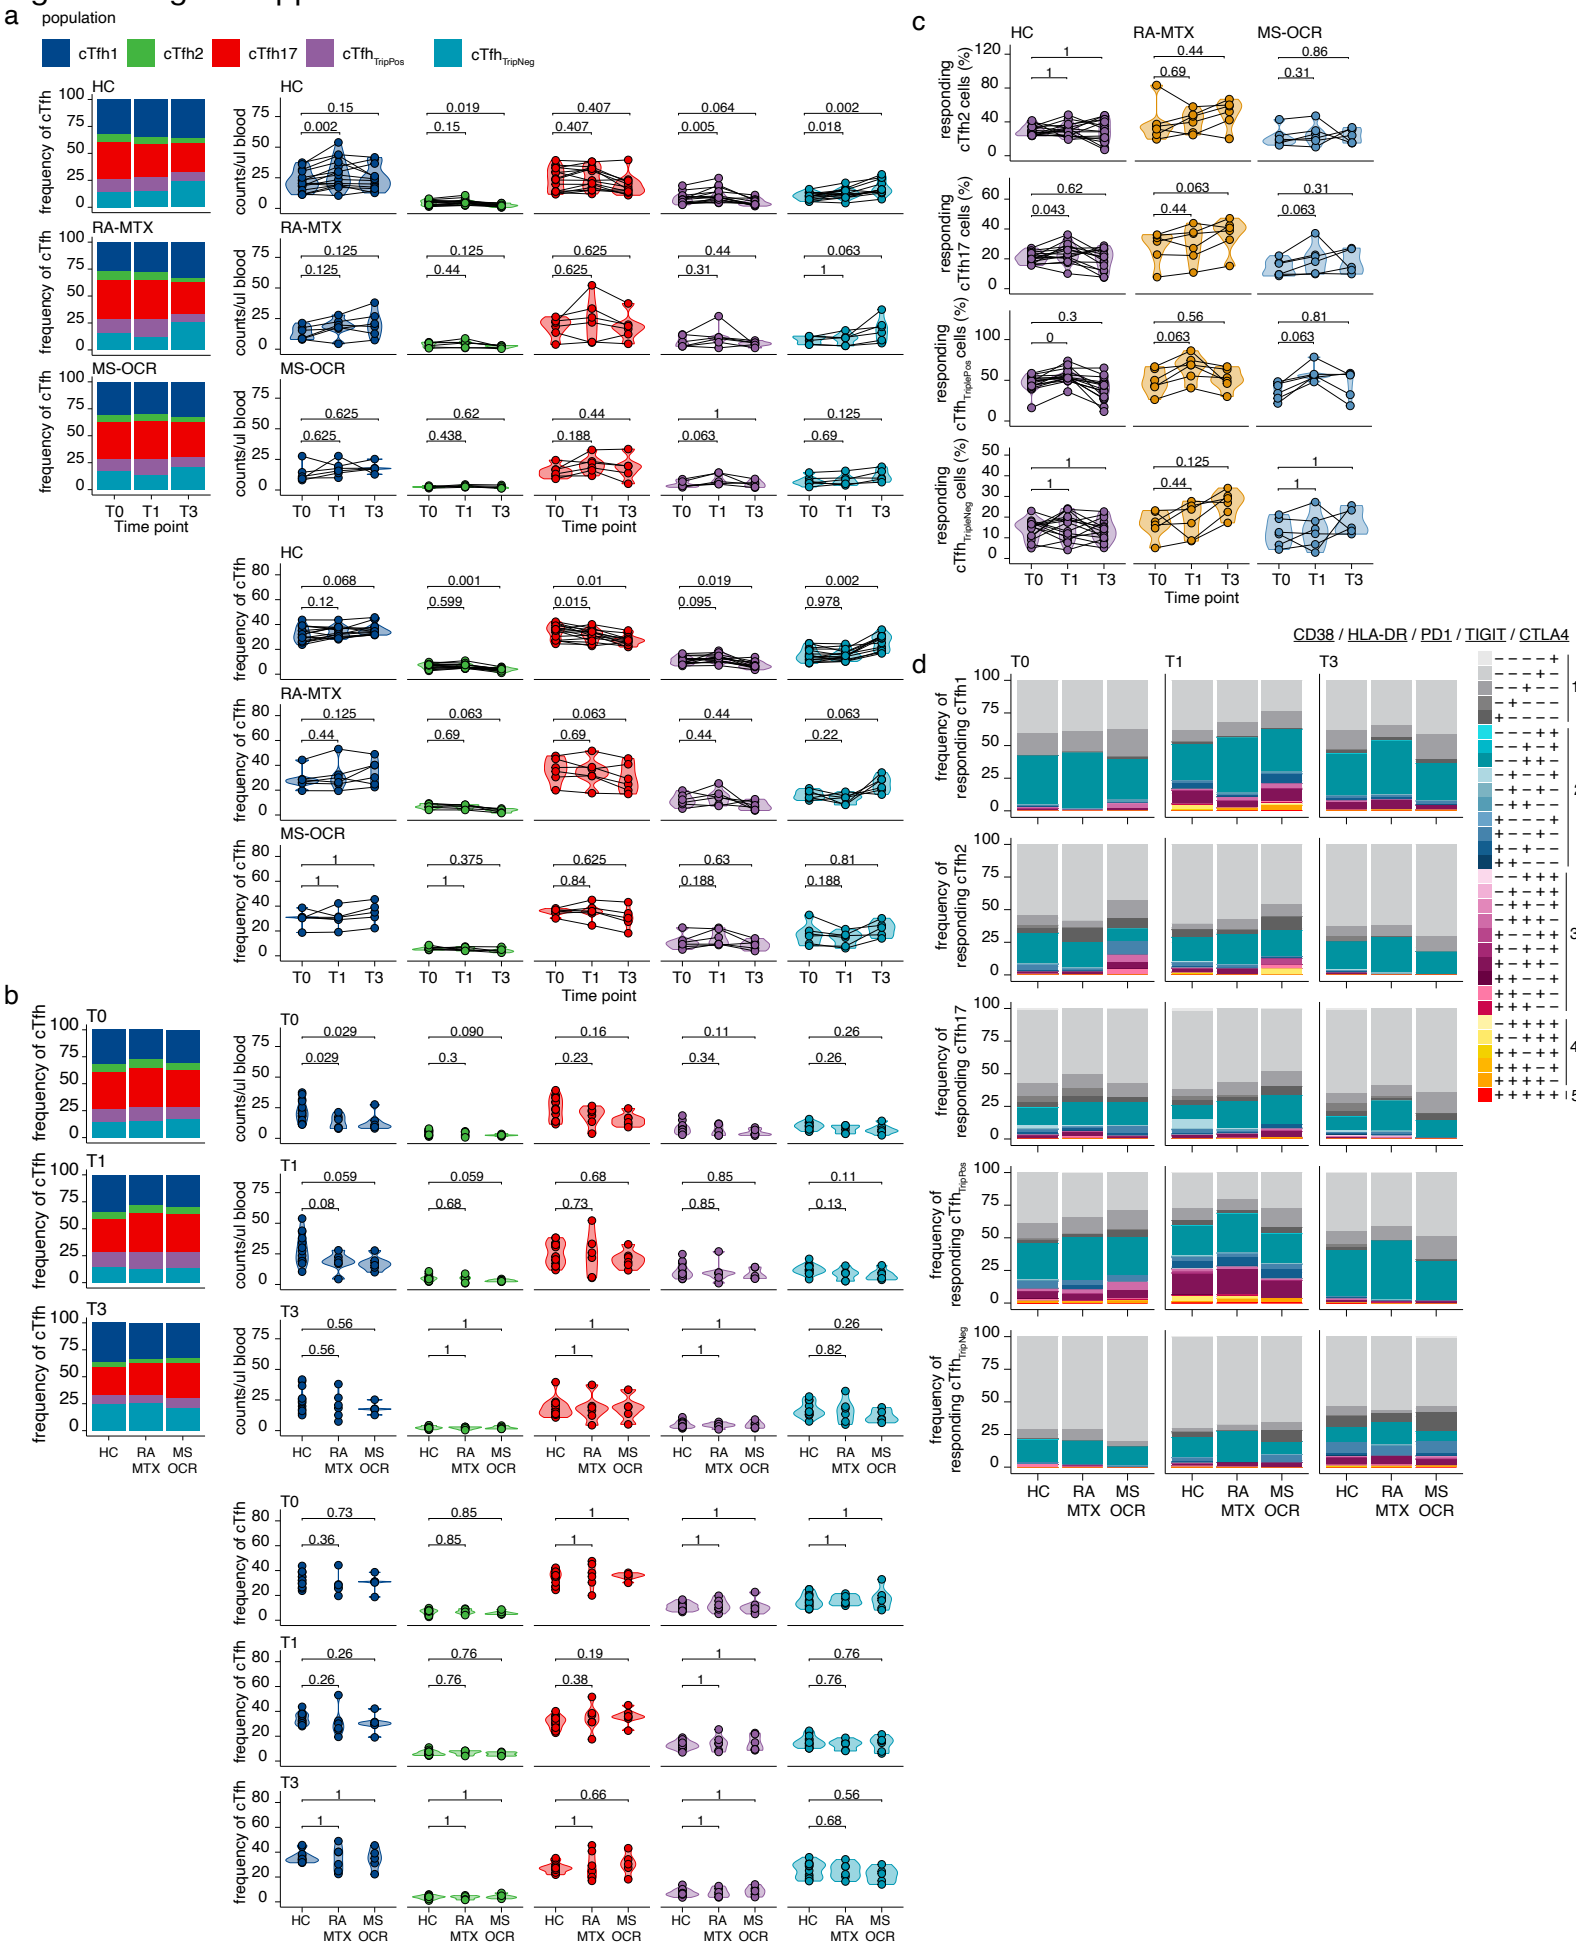

Supplement: supp [file elife_poa_e77969_Figure_3_figure_supplement_1.pdf › elife_poa_e77969_Figure_3_figure_supplement_1.pdf]

Figure 4—figure supplements 1

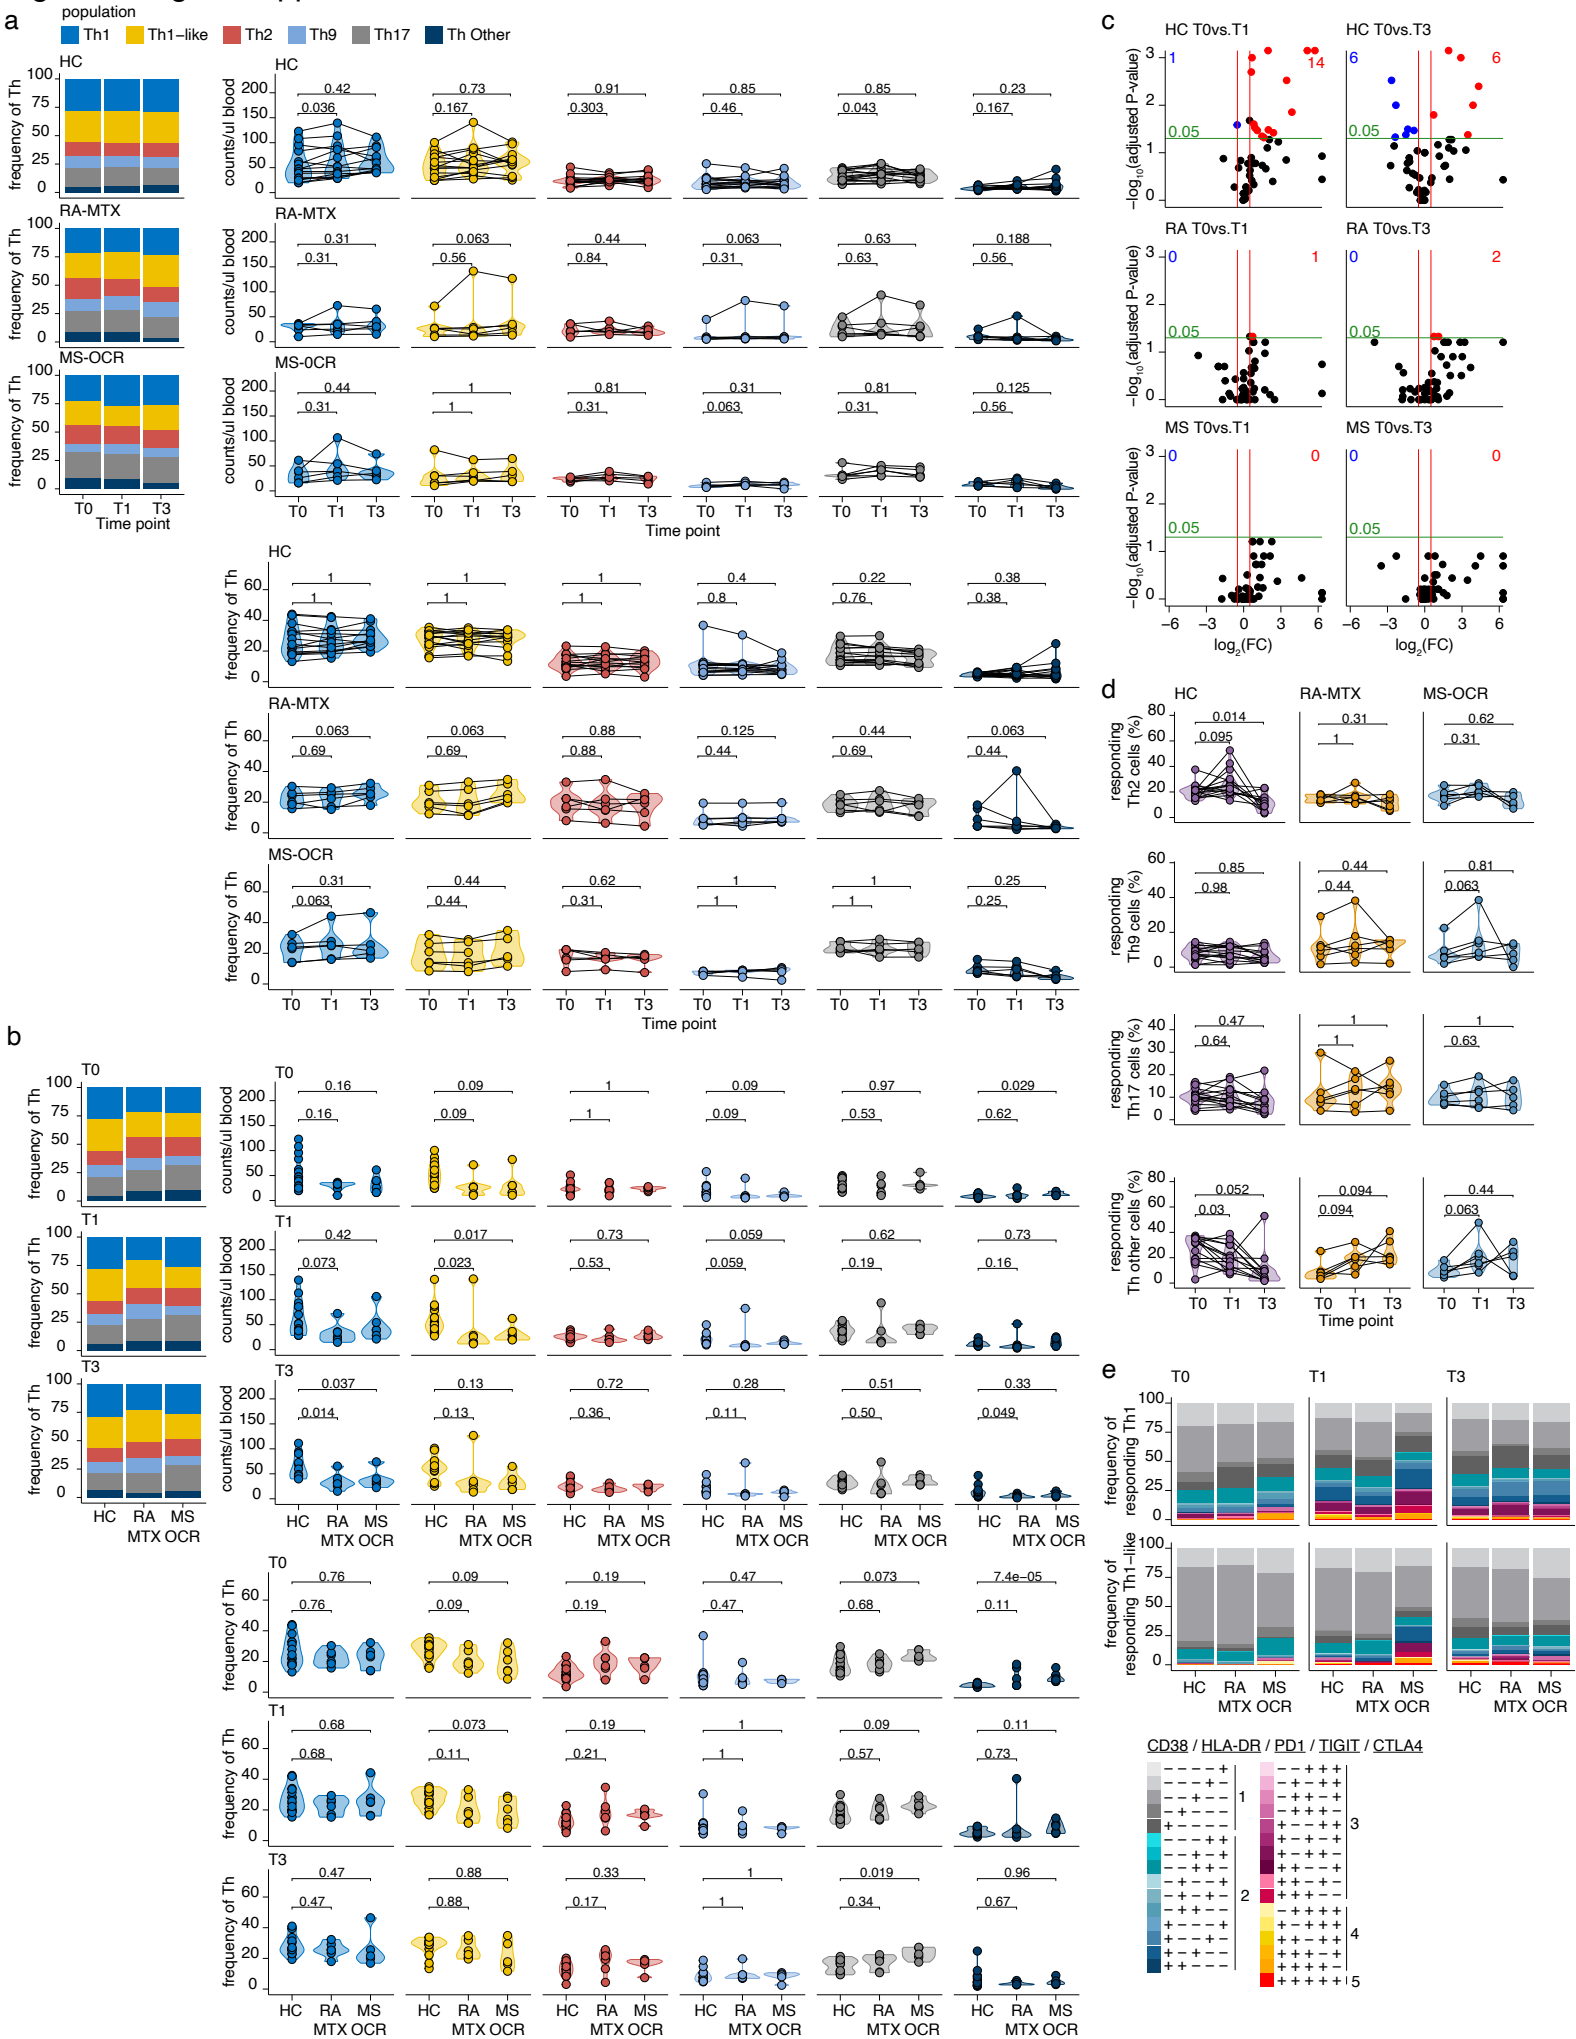

Supplement: supp [file elife_poa_e77969_Figure_4_figure_supplement_1.pdf › elife_poa_e77969_Figure_4_figure_supplement_1.pdf]

Figure 5—figure supplements 1

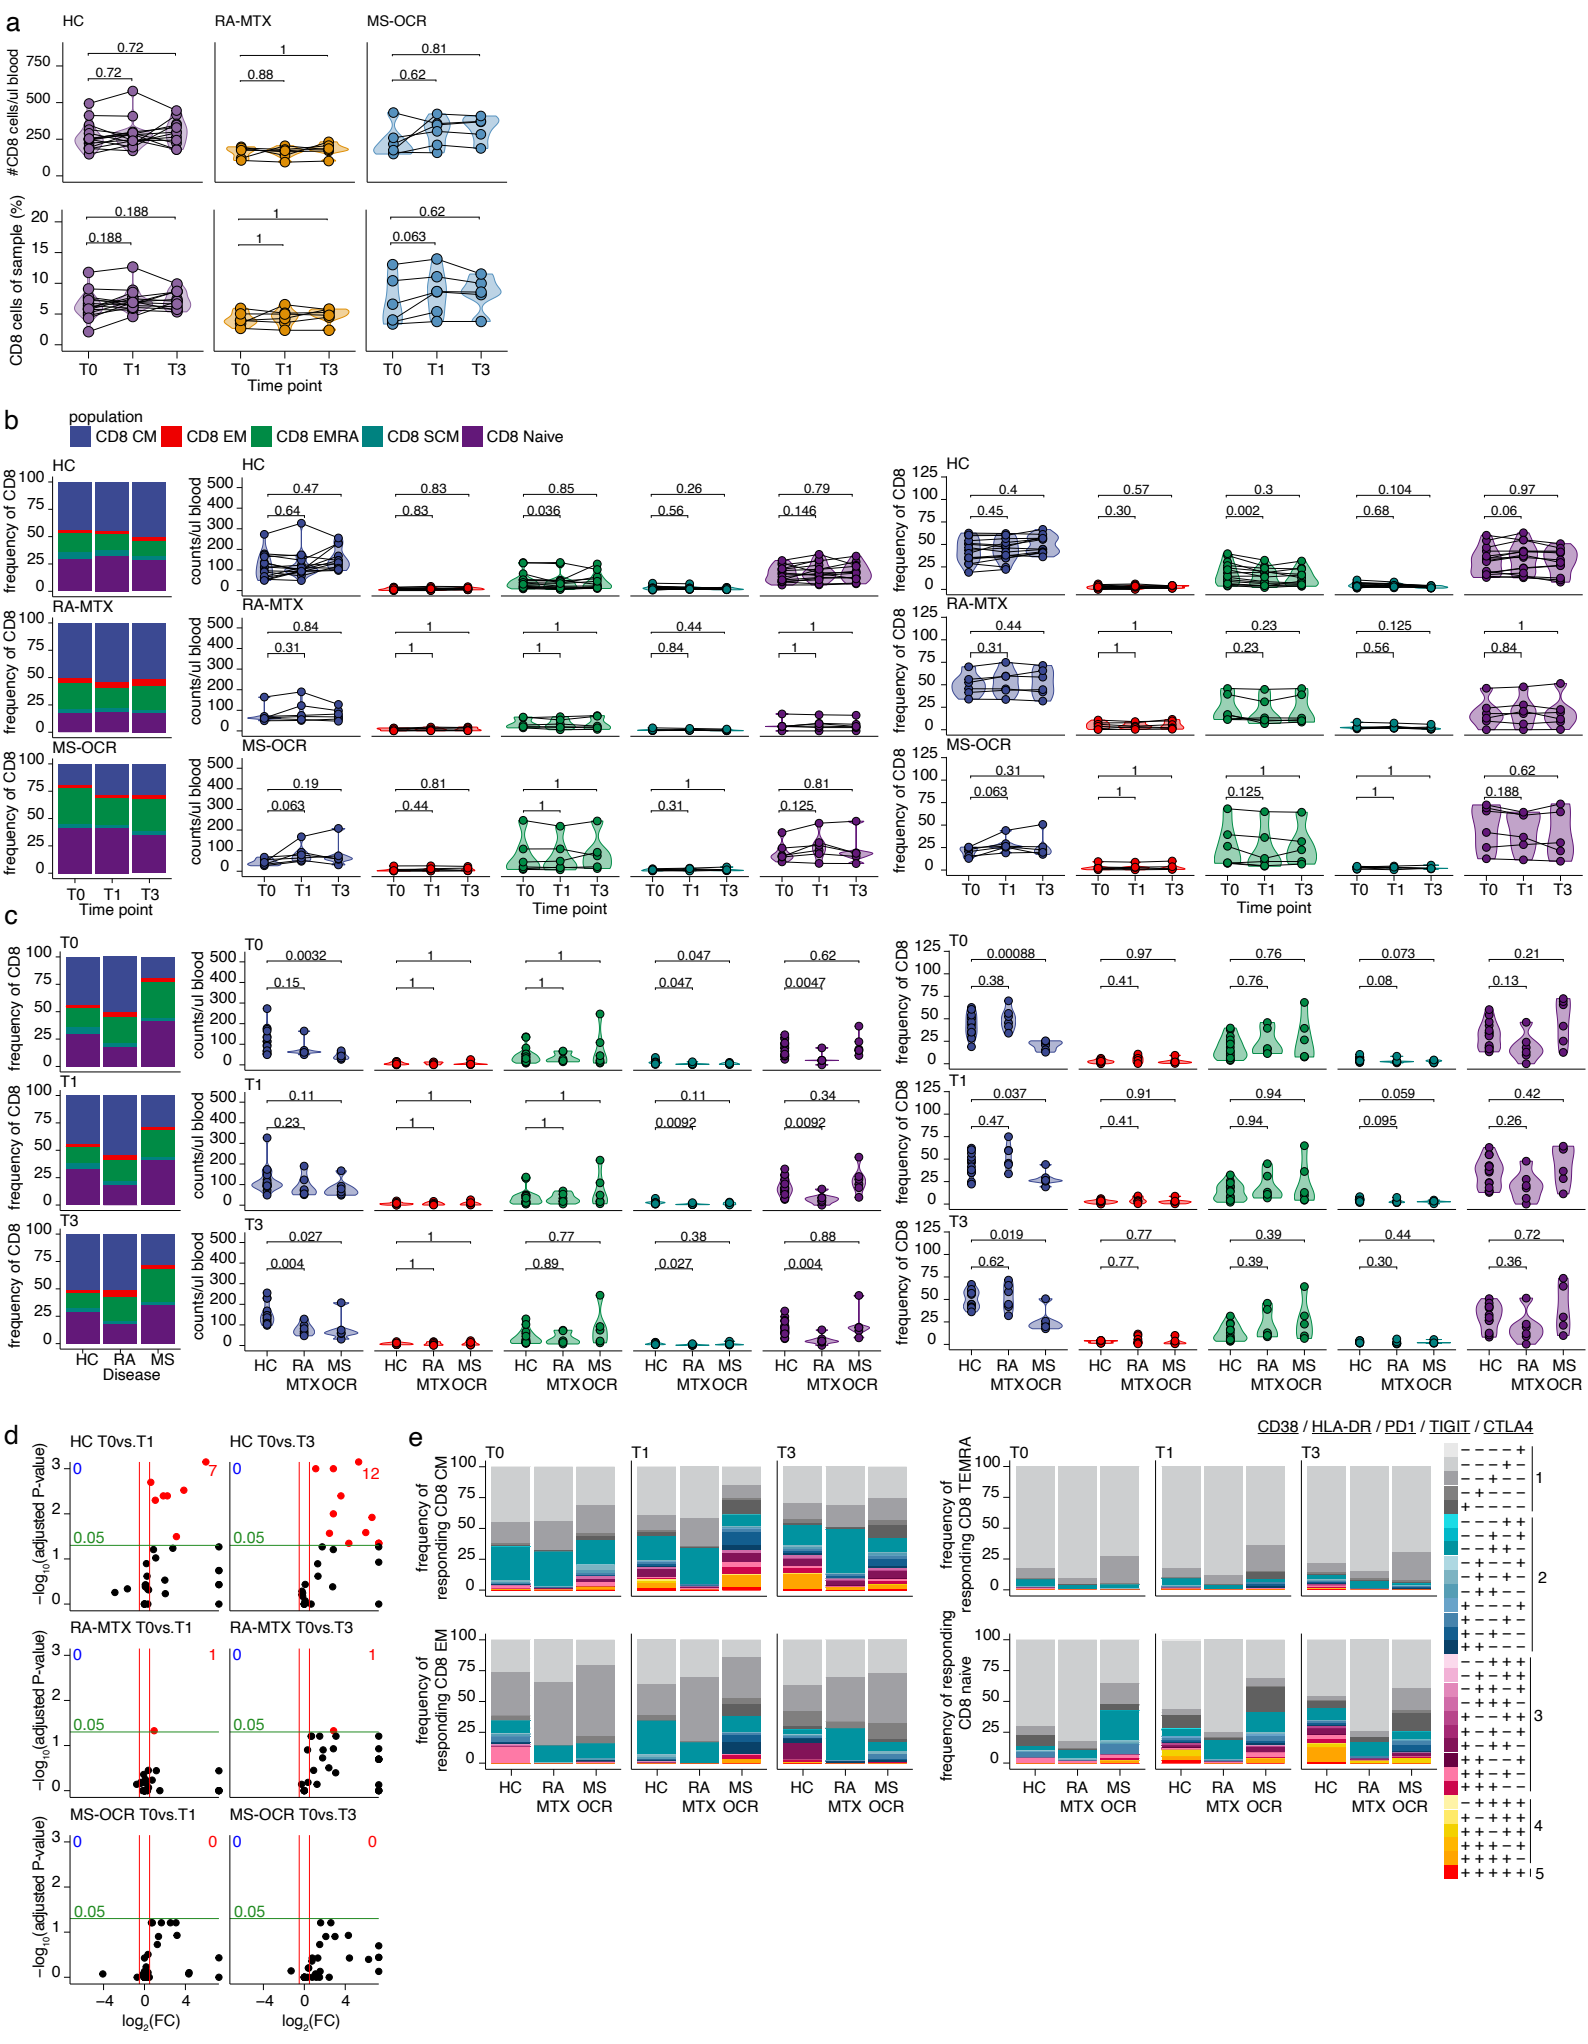

Supplement: supp [file elife_poa_e77969_Figure_5_figure_supplement_1.pdf › elife_poa_e77969_Figure_5_figure_supplement_1.pdf]
